# Supplementary material for: Dynamic Interchanging Native States of Lymphotactin Examined by SNAPP-MS
Source: PubMed Central journal article supplement — J Am Soc Mass Spectrom. 2011 Jan 15;22(3):399–407. doi: 10.1007/s13361-010-0042-3 (PMC3061006; doi:10.1007/s13361-010-0042-3), 2011-01-15
Supplement: 13361_2010_42_MOESM1_ESM.pdf [file 13361_2010_42_MOESM1_ESM.pdf]

Supporting Data for

Dynamic Interchanging Native States of Lymphotoctin Examined  
by SNAPP-MS

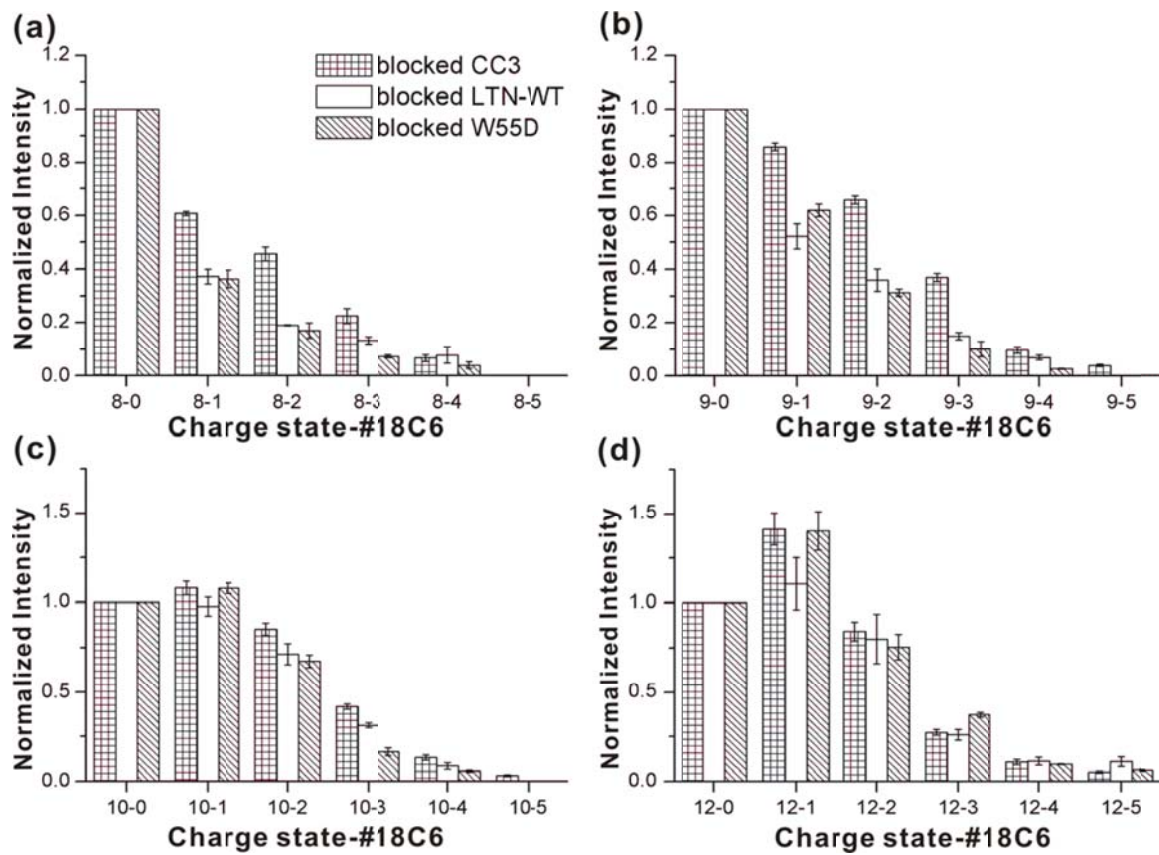

**Figure S1.** SNAPP distributions for three variants of blocked Lymphotoctin sampled from water

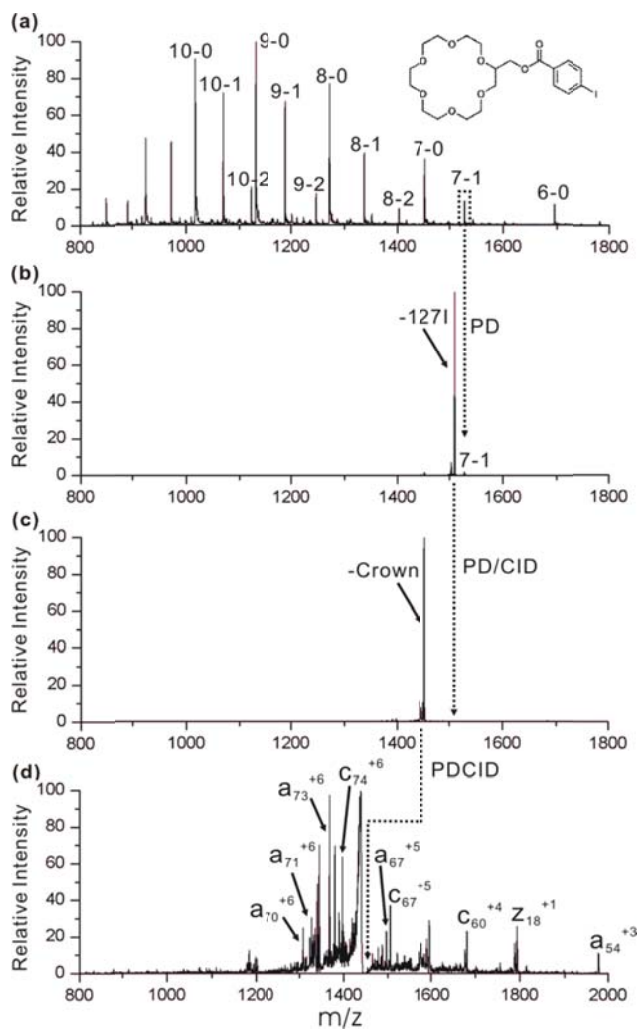

**Figure S2.** Data acquisition procedure for RDD experiments examining gas phase structure.

S2a: Full MS distribution of Ltn-wt-IBA18C6 adduct

S2b: PD of [Ltn-wt+IBA18C6]<sup>+7</sup>

S2c: PD/CID of [Ltn-wt+IBA18C6-127I•]<sup>+7</sup>

S2d: PD/CID of [Ltn-wt•]<sup>+7</sup>

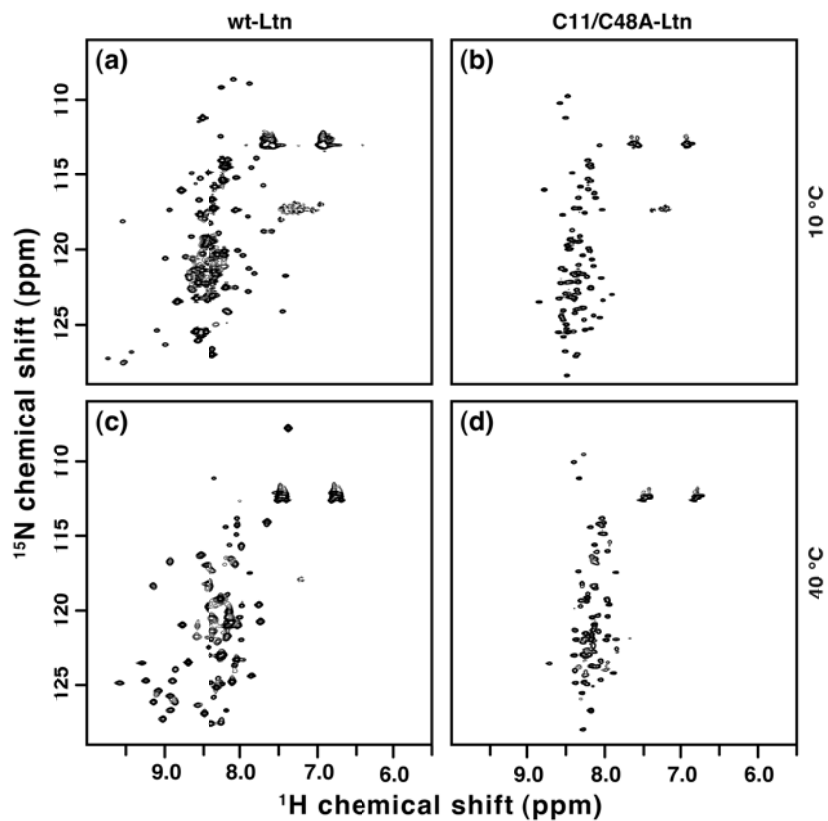

**Figure S3.** Alanine mutation of the Ltn disulfide bond unfolds Ltn.  $^1\text{H}$ - $^{15}\text{N}$  HSQC spectra of wild-type and C11A/C48A-Ltn acquired at 10 and 40 °C. All spectra were acquired in 20 mM sodium phosphate at pH 6.0.
